# Supplementary material
Source: HighWire-hosted journal article supplement (https://bmjopen.bmj.com/content/15/4/e095759)

## Sample Sizes for Comparing Two Proportions

### Influence of Changing Input values on Sample Size Estimates

Figure created by Statulator beta: [www.statulator.com/SampleSize/ss2P.html](http://www.statulator.com/SampleSize/ss2P.html)

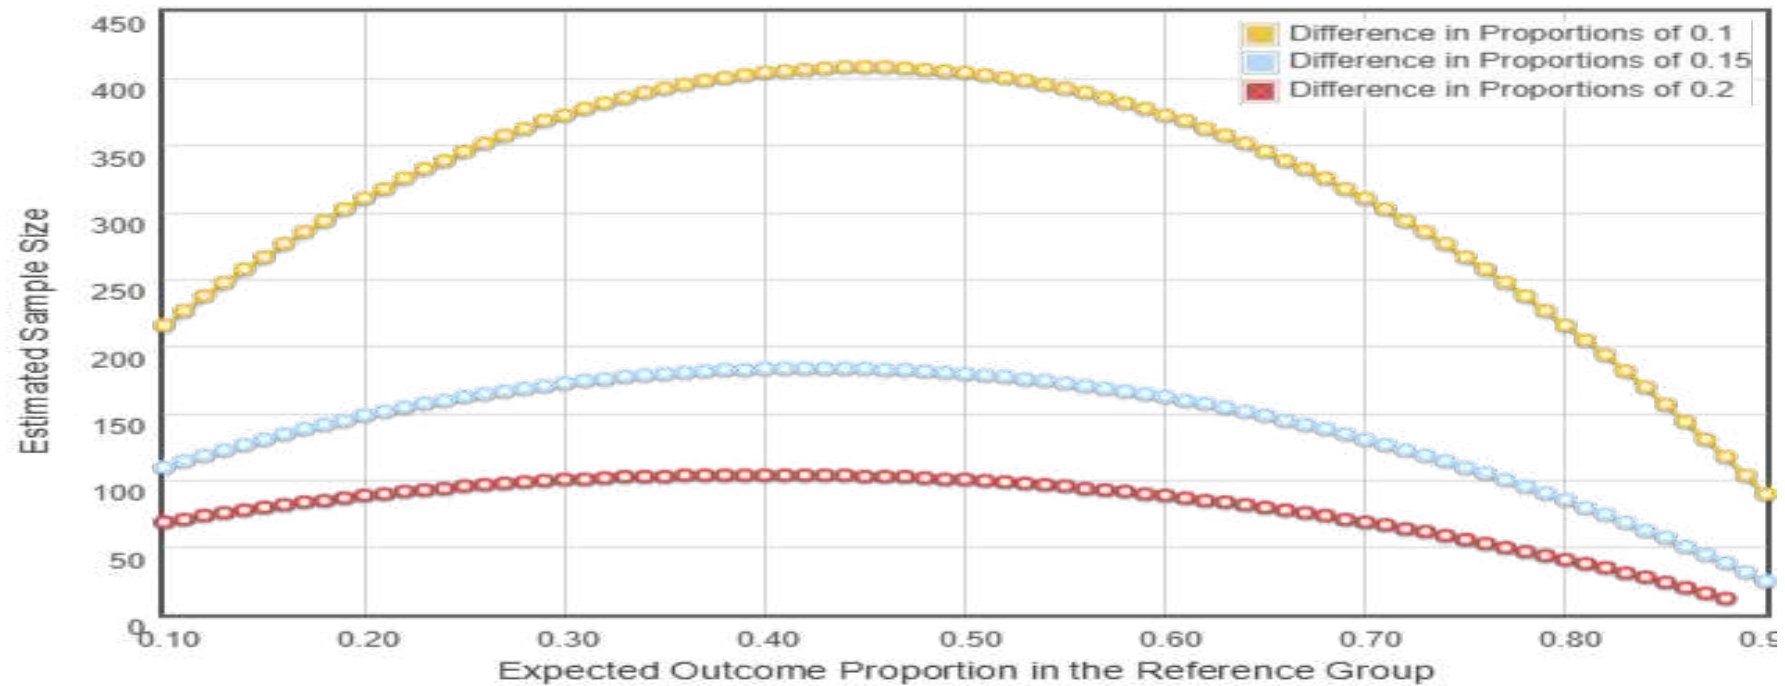

Supplement: inline-supplementary-material-1 [file inline-supplementary-material-1.pdf]
