# Supplementary material
Source: HighWire-hosted journal article supplement (https://bmjopen.bmj.com/content/15/4/e095759)
Supplement: inline-supplementary-material-4 [file inline-supplementary-material-4.pdf]

# SENOVIE, France | Medical Questionnaire

Please complete the questionnaire below.

Thank you !

| IDENTIFICATION                         |                                                                                                                                                                                        |
|----------------------------------------|----------------------------------------------------------------------------------------------------------------------------------------------------------------------------------------|
| Q001. Name of Inclusion Hospital       | <div><input type="radio"/> Saint-Louis</div> <div><input type="radio"/> Delafontaine</div> <div><input type="radio"/> Robert Ballanger</div> <div><input type="radio"/> Avicenne</div> |
| Q002. Date of inclusion of the woman   | <div></div>                                                                                                                                                                            |
| Q003. Participant ID                   | <div></div> <div>(Double entry of the SENOVIE identifier)</div>                                                                                                                        |
| Q004. Year of birth of the participant | <div></div>                                                                                                                                                                            |

|                                           |                                                                                                                                                                                                                                                                                                                                                                                                                                                                                                                                                                                                                                                                                                                                                                                                                                                                                                                                                                                                                                                                                                                                                                                                                                                                                                                                                                                                                                                                                                                                                                                                                                                                                                                                                                                                                                                                                                                                                                                                                                                                                                                                                        |
|-------------------------------------------|--------------------------------------------------------------------------------------------------------------------------------------------------------------------------------------------------------------------------------------------------------------------------------------------------------------------------------------------------------------------------------------------------------------------------------------------------------------------------------------------------------------------------------------------------------------------------------------------------------------------------------------------------------------------------------------------------------------------------------------------------------------------------------------------------------------------------------------------------------------------------------------------------------------------------------------------------------------------------------------------------------------------------------------------------------------------------------------------------------------------------------------------------------------------------------------------------------------------------------------------------------------------------------------------------------------------------------------------------------------------------------------------------------------------------------------------------------------------------------------------------------------------------------------------------------------------------------------------------------------------------------------------------------------------------------------------------------------------------------------------------------------------------------------------------------------------------------------------------------------------------------------------------------------------------------------------------------------------------------------------------------------------------------------------------------------------------------------------------------------------------------------------------------|
| Q005. Country of birth of the participant | <div><div><input type="radio"/> Other</div><div><input type="radio"/> country</div><div><input type="radio"/> France</div><div><input type="radio"/> South Africa</div><div><input type="radio"/> Angola</div><div><input type="radio"/> Benin</div><div><input type="radio"/> Botswana</div><div><input type="radio"/> Burkina Faso</div><div><input type="radio"/> Burundi</div><div><input type="radio"/> Cameroon</div><div><input type="radio"/> Cape Verde</div><div><input type="radio"/> Comoros</div><div><input type="radio"/> Côte d'Ivoire</div><div><input type="radio"/> Djibouti</div><div><input type="radio"/> Eritrea</div><div><input type="radio"/> Ethiopia</div><div><input type="radio"/> Gabon</div><div><input type="radio"/> Gambia</div><div><input type="radio"/> Ghana</div><div><input type="radio"/> Guinea</div><div><input type="radio"/> Guinea-Bissau</div><div><input type="radio"/> Equatorial Guinea</div><div><input type="radio"/> Kenya</div><div><input type="radio"/> Lesotho</div><div><input type="radio"/> Liberia</div><div><input type="radio"/> Madagascar</div><div><input type="radio"/> Malawi</div><div><input type="radio"/> Little</div><div><input type="radio"/> Mauritania</div><div><input type="radio"/> Mozambique</div><div><input type="radio"/> Namibia</div><div><input type="radio"/> Niger</div><div><input type="radio"/> Nigeria</div><div><input type="radio"/> Uganda</div><div><input type="radio"/> Central African Republic Democratic</div><div><input type="radio"/> Republic of the Congo</div><div><input type="radio"/> Rwanda</div><div><input type="radio"/> São Tomé and Príncipe</div><div><input type="radio"/> Senegal</div><div><input type="radio"/> Seychelles,</div><div><input type="radio"/> Sierra Leone,</div><div><input type="radio"/> Somalia,</div><div><input type="radio"/> South Sudan,</div><div><input type="radio"/> Swaziland,</div><div><input type="radio"/> Tanzania,</div><div><input type="radio"/> Chad</div><div><input type="radio"/> Togo</div><div><input type="radio"/> Zambie</div><div><input type="radio"/> Zimbabwe</div></div> |
|-------------------------------------------|--------------------------------------------------------------------------------------------------------------------------------------------------------------------------------------------------------------------------------------------------------------------------------------------------------------------------------------------------------------------------------------------------------------------------------------------------------------------------------------------------------------------------------------------------------------------------------------------------------------------------------------------------------------------------------------------------------------------------------------------------------------------------------------------------------------------------------------------------------------------------------------------------------------------------------------------------------------------------------------------------------------------------------------------------------------------------------------------------------------------------------------------------------------------------------------------------------------------------------------------------------------------------------------------------------------------------------------------------------------------------------------------------------------------------------------------------------------------------------------------------------------------------------------------------------------------------------------------------------------------------------------------------------------------------------------------------------------------------------------------------------------------------------------------------------------------------------------------------------------------------------------------------------------------------------------------------------------------------------------------------------------------------------------------------------------------------------------------------------------------------------------------------------|

|                                                                                                   |                                                                                                                                                                                                                                                                   |
|---------------------------------------------------------------------------------------------------|-------------------------------------------------------------------------------------------------------------------------------------------------------------------------------------------------------------------------------------------------------------------|
| Q007. Date of first documented consultation in the medical file for the management of the cancer? | <div></div>                                                                                                                                                                                                                                                       |
| Q009. Family history of breast cancer / ovary ?                                                   | <div><div><input type="radio"/> No</div><div><input type="radio"/> Yes</div></div>                                                                                                                                                                                |
| Q010. Circumstances of breast cancer diagnosis                                                    | <div><div><input type="radio"/> Clinical sign</div><div><input type="radio"/> Screening (during a campaign or individual screening)</div></div>                                                                                                                   |
| Q011. HIV Positive                                                                                | <div><div><input type="radio"/> No</div><div><input type="radio"/> Yes</div></div>                                                                                                                                                                                |
| Q011.1. Date of HIV diagnosis                                                                     | <div></div>                                                                                                                                                                                                                                                       |
| CLINICAL                                                                                          |                                                                                                                                                                                                                                                                   |
| Q012.1 Size in cm                                                                                 | <div><div></div><div>(Note only the numeric values. For 1m65, rate 165)</div></div>                                                                                                                                                                               |
| Q012.2 Weight in Kg (first known)                                                                 | <div><div></div><div>(Note only the numeric values. For 65 kg, rate 65)</div></div>                                                                                                                                                                               |
| Q013. Menopausal at the time of diagnosis                                                         | <div><div><input type="radio"/> No</div><div><input type="radio"/> Yes</div></div>                                                                                                                                                                                |
| Q014. Pregnancy in progress at the time of diagnosis                                              | <div><div><input type="radio"/> No</div><div><input type="radio"/> Yes</div></div>                                                                                                                                                                                |
| Q015. Clinical tumour size (cT)                                                                   | <div><div><div><input type="radio"/> T0</div><div><input type="radio"/> T1</div><div><input type="radio"/> T2</div><div><input type="radio"/> T3</div><div><input type="radio"/> T4</div></div><div>(Information to be collected in the medical file)</div></div> |
| Q016. Clinical Classification of Lymph Nodes (cN)                                                 | <div><div><div><input type="radio"/> N0</div><div><input type="radio"/> N1</div><div><input type="radio"/> N2</div><div><input type="radio"/> N3</div></div><div>(Information to be collected in the medical file)</div></div>                                    |
| Q017. Clinical presence of distant metastasis (clinical or radiological metastasis)               | <div><div><div><input type="radio"/> M0</div><div><input type="radio"/> M1</div></div></div>                                                                                                                                                                      |

| PATHOLOGICAL                                        |                                                                                                                                                                                                                                                                                       |
|-----------------------------------------------------|---------------------------------------------------------------------------------------------------------------------------------------------------------------------------------------------------------------------------------------------------------------------------------------|
| Q018. Form of cancer                                | <div><input type="radio"/> In situ</div> <div><input type="radio"/> Infiltrating</div>                                                                                                                                                                                                |
| Q019. Histological type                             | <div><input type="radio"/> NST (Invasive Canal)</div> <div><input type="radio"/> Infiltrating lobular</div> <div><input type="radio"/> Other</div>                                                                                                                                    |
| Q019.1. Other histological type, please specify     | <div></div> <div>(Note the type or "Don't know" if you don't have the information)</div>                                                                                                                                                                                              |
| Q020. Grade SBR                                     | <div><input type="radio"/> 1</div> <div><input type="radio"/> 2</div> <div><input type="radio"/> 3</div>                                                                                                                                                                              |
| Q021. Emboles                                       | <div><input type="radio"/> No</div> <div><input type="radio"/> Yes</div>                                                                                                                                                                                                              |
| Q022.1 ER (estrogen receptors)                      | <div><input type="radio"/></div> <div><input type="radio"/> Negative</div> <div><input type="radio"/> Positive</div>                                                                                                                                                                  |
| Q022.2 PR (progesterone receptors)                  | <div><input type="radio"/></div> <div><input type="radio"/> Negative</div> <div><input type="radio"/> Positive</div>                                                                                                                                                                  |
| Q022.3 HER 2                                        | <div><input type="radio"/> Negative (0, 1+, 2+ unamplified)</div> <div><input type="radio"/> Positive (2+ amplified, 3+)</div>                                                                                                                                                        |
| Q023.1 pTNM or ypTNM ?                              | <div><input type="radio"/> pTNM</div> <div><input type="radio"/> ypTNM (neo-adjuvant)</div>                                                                                                                                                                                           |
| Q023.2 Tumour size (pT or ypT)                      | <div><input type="radio"/> T0</div> <div><input type="radio"/> Tis</div> <div><input type="radio"/> T1</div> <div><input type="radio"/> T2</div> <div><input type="radio"/> T3</div> <div><input type="radio"/> T4</div> <div>(Information to be collected in the medical file)</div> |
| Q024. Classification of the lymph nodes (pN or ypN) | <div><input type="radio"/> N0</div> <div><input type="radio"/> N1</div> <div><input type="radio"/> N2</div> <div><input type="radio"/> N3</div> <div>(Information to be collected in the medical file)</div>                                                                          |
| Q025. Presence of distant metastasis (pM or ypM)    | <div><input type="radio"/> M0</div> <div><input type="radio"/> M1</div>                                                                                                                                                                                                               |

|                                                                                   |                                                                                                                                                                                                                                                                                                                                                                        |
|-----------------------------------------------------------------------------------|------------------------------------------------------------------------------------------------------------------------------------------------------------------------------------------------------------------------------------------------------------------------------------------------------------------------------------------------------------------------|
| Q026. Stage of cancer at diagnosis?                                               | <div><div><input type="radio"/> 0</div><div><input type="radio"/> I</div><div><input type="radio"/> IIA</div><div><input type="radio"/> IIB</div><div><input type="radio"/> IIIA</div><div><input type="radio"/> IIIB</div><div><input type="radio"/> IIIC</div><div><input type="radio"/> IV</div></div> <div>(Information to be collected in the medical file)</div> |
| Q027. Has she had chemotherapy in treatment initial (regardless of the location)? | <div><div><input type="radio"/> No</div><div><input type="radio"/> Yes</div></div>                                                                                                                                                                                                                                                                                     |
| Q027.1 Type of chemotherapy                                                       | <div><div><input type="radio"/> Adjuvant Neo-</div><div><input type="radio"/> adjuvant</div><div><input type="radio"/> Neo-adjuvant + metastatic adjuvant</div><div><input type="radio"/></div></div>                                                                                                                                                                  |
| Q027.2 Chemotherapy start date                                                    | <div></div>                                                                                                                                                                                                                                                                                                                                                            |
| Q027.3 Chemotherapy end date                                                      | <div></div>                                                                                                                                                                                                                                                                                                                                                            |
| Q027.4 Type (therapeutic class)                                                   | <div><div></div><div>(Note the type or "Don't know" if you don't have the information)</div></div>                                                                                                                                                                                                                                                                     |
| Q027.5 Number of Chemotherapy Cycles                                              | <div><div></div><div>(Write down the exact number or "999" if you don't have the information)</div></div>                                                                                                                                                                                                                                                              |
| Q027.6 Has she received all or part of her chemotherapy outside France?           | <div><div><input type="radio"/> No</div><div><input type="radio"/> Yes</div></div>                                                                                                                                                                                                                                                                                     |
| Q027.6.1 In which country?                                                        | <div><div></div><div>(Note the country or "Don't know" if you don't have the information)</div></div>                                                                                                                                                                                                                                                                  |
| Q028. Did she have surgery as an initial treatment? (regardless of the location)? | <div><div><input type="radio"/> No</div><div><input type="radio"/> Yes</div></div>                                                                                                                                                                                                                                                                                     |
| Q028.1. Date of First Surgery                                                     | <div></div>                                                                                                                                                                                                                                                                                                                                                            |
| Q028.2. What type of surgery?                                                     | <div><div><input type="checkbox"/> Total mastectomy</div><div><input type="checkbox"/> Partial mastectomy</div><div><input type="checkbox"/> Axillary dissection</div><div><input type="checkbox"/> Sentinel lymph node</div><div><input type="checkbox"/> Other</div><div>(Several answers possible)</div></div>                                                      |
| Q028.2.1. Other types of surgery, please specify                                  | <div></div>                                                                                                                                                                                                                                                                                                                                                            |

|                                                                                         |                                                                                                                                                                                                |
|-----------------------------------------------------------------------------------------|------------------------------------------------------------------------------------------------------------------------------------------------------------------------------------------------|
| Q028.3. Side of surgery                                                                 | <div><input type="radio"/> Right</div> <div><input type="radio"/> Left</div> <div><input type="radio"/> Bilateral</div>                                                                        |
| Q028.4. Revision surgery                                                                | <div><input type="radio"/> No</div> <div><input type="radio"/> Yes</div>                                                                                                                       |
| Q028.5 Has she received all or part of her surgery outside France?                      | <div><input type="radio"/> No</div> <div><input type="radio"/> Yes</div>                                                                                                                       |
| Q028.5.1 In which country?                                                              | <div></div> <div>(Note the country or "Don't know" if you don't have the information)</div>                                                                                                    |
| Q028.6. Did she have reconstructive surgery (regardless of the location)?               | <div><input type="radio"/> No</div> <div><input type="radio"/> Yes</div>                                                                                                                       |
| Q028.6.1. Has it received all or part of its reconstructive surgery outside France?     | <div><input type="radio"/> No</div> <div><input type="radio"/> Yes</div>                                                                                                                       |
| Q028.6.1.1. In which country?                                                           | <div></div> <div>(Note the country or "Don't know" if you don't have the information)</div>                                                                                                    |
| Q029. Has she had radiation therapy in treatment? initial (regardless of the location)? | <div><input type="radio"/> No</div> <div><input type="radio"/> Yes</div>                                                                                                                       |
| Q029.1. Radiation therapy start date                                                    | <div></div>                                                                                                                                                                                    |
| Q029.2. End date of radiation therapy                                                   | <div></div>                                                                                                                                                                                    |
| Q029.3. Which areas were irradiated?                                                    | <div><input type="checkbox"/> Breast</div> <div><input type="checkbox"/> chest wall Lymph</div> <div><input type="checkbox"/> node areas Other</div> <div><input type="checkbox"/> areas</div> |
| Q029.3.1. Other irradiated areas, specify which ones                                    | <div></div>                                                                                                                                                                                    |
| Q029.4. Has she received all or part of her radiotherapy outside France?                | <div><input type="radio"/> No</div> <div><input type="radio"/> Yes</div>                                                                                                                       |
| Q029.4.1. In which country?                                                             | <div></div> <div>(Note the country or "Don't know" if you don't have the information)</div>                                                                                                    |
| Q030. Has she had hormone therapy in treatment? initial (regardless of the location)?   | <div><input type="radio"/> No</div> <div><input type="radio"/> Yes</div>                                                                                                                       |
| Q030.1. Hormonal Therapy Start Date                                                     | <div></div>                                                                                                                                                                                    |

|                                                                                                       |                                                                                                                                                                                                                                                                                                                                                                                                                |
|-------------------------------------------------------------------------------------------------------|----------------------------------------------------------------------------------------------------------------------------------------------------------------------------------------------------------------------------------------------------------------------------------------------------------------------------------------------------------------------------------------------------------------|
| Q030.2. End date of hormonal therapy                                                                  |                                                                                                                                                                                                                                                                                                                                                                                                                |
| <div></div>                                                                                           |                                                                                                                                                                                                                                                                                                                                                                                                                |
| Q030.3. What treatments did the patient receive for his hormone therapy (regardless of the location)? | <div><div><input type="radio"/> Tamoxifen</div><div><input type="radio"/> Anti-aromatase</div><div><input type="radio"/> LH-RH Agonist</div><div><input type="radio"/> Others</div></div>                                                                                                                                                                                                                      |
| Q030.3.1. Other treatments received with hormone therapy, please specify                              |                                                                                                                                                                                                                                                                                                                                                                                                                |
| <div></div>                                                                                           |                                                                                                                                                                                                                                                                                                                                                                                                                |
| Q030.4. Has it received all or part of its Hormone therapy outside France?                            | <div><div><input type="radio"/> No</div><div><input type="radio"/> Yes</div></div>                                                                                                                                                                                                                                                                                                                             |
| Q030.4.1. In which country?                                                                           |                                                                                                                                                                                                                                                                                                                                                                                                                |
| <div></div>                                                                                           |                                                                                                                                                                                                                                                                                                                                                                                                                |
| Q031. Has she had targeted therapy in treatment? initial (regardless of the location)?                | <div><div><input type="radio"/> No</div><div><input type="radio"/> Yes</div></div>                                                                                                                                                                                                                                                                                                                             |
| Q031.1. What targeted therapies did she receive?                                                      | <div><div><input type="radio"/> Trastuzumab (Herceptin)</div><div><input type="radio"/> Immunotherapy (Pembrolizumab)</div><div><input type="radio"/> Other</div></div>                                                                                                                                                                                                                                        |
| Q031.2. Other targeted therapies received, please specify                                             |                                                                                                                                                                                                                                                                                                                                                                                                                |
| <div></div>                                                                                           |                                                                                                                                                                                                                                                                                                                                                                                                                |
| Q031.4 Has she received all or part of her therapy targeted outside France?                           | <div><div><input type="radio"/> No</div><div><input type="radio"/> Yes</div></div>                                                                                                                                                                                                                                                                                                                             |
| Q031.4.1. In which country?                                                                           |                                                                                                                                                                                                                                                                                                                                                                                                                |
| <div>(Note the country or "Don't know" if you don't have the information)</div>                       |                                                                                                                                                                                                                                                                                                                                                                                                                |
| <div></div>                                                                                           |                                                                                                                                                                                                                                                                                                                                                                                                                |
| Q033. Has she had a local recurrence (regardless of the moment, whatever the country)?                | <div><div><input type="radio"/> No</div><div><input type="radio"/> Yes</div></div>                                                                                                                                                                                                                                                                                                                             |
| Q033.1. Date of the first documented local recurrence                                                 |                                                                                                                                                                                                                                                                                                                                                                                                                |
| <div></div>                                                                                           |                                                                                                                                                                                                                                                                                                                                                                                                                |
| Q034. Has she had a metastatic recurrence (what whatever the time, whatever the country)?             | <div><div><input type="radio"/> No</div><div><input type="radio"/> Yes</div></div>                                                                                                                                                                                                                                                                                                                             |
| Q034.1. Date of First Documented Metastatic Recurrence                                                |                                                                                                                                                                                                                                                                                                                                                                                                                |
| <div></div>                                                                                           |                                                                                                                                                                                                                                                                                                                                                                                                                |
| Q034.2. Treatments received since metastatic recurrence                                               | <div><div><input type="checkbox"/> Chemotherapy</div><div><input type="checkbox"/> Intravenous Targeted</div><div><input type="checkbox"/> Therapy Hormone Therapy</div><div><input type="checkbox"/> Oral Targeted</div><div><input type="checkbox"/> Therapy</div><div><input type="checkbox"/> Radiotherapy</div><div><input type="checkbox"/> Surgery</div><div><input type="checkbox"/> Other</div></div> |

|                                                                                                  |                                                                                                                                                                                                                                                                                                                                  |
|--------------------------------------------------------------------------------------------------|----------------------------------------------------------------------------------------------------------------------------------------------------------------------------------------------------------------------------------------------------------------------------------------------------------------------------------|
| Q034.2.1. Other treatments received since metastatic recurrence, please specify                  | <div>(Note the treatment or "Don't know" if you don't have the information)</div>                                                                                                                                                                                                                                                |
| Q034.3. Number of lines of treatment received since metastatic recurrence                        | <div>(Write down the exact number or "999" if you don't have the information)</div>                                                                                                                                                                                                                                              |
| Q034.5. Has he received all or part of the treatments for metastatic recurrence outside France ? | <div><input type="radio"/> No<br/><input type="radio"/> Yes</div>                                                                                                                                                                                                                                                                |
| Q034.5.1 In which country?                                                                       | <div>(Note the country or "Don't know" if you don't have the information)</div>                                                                                                                                                                                                                                                  |
| Q036. Has she received an offer to meet A palliative care team?                                  | <div><input type="radio"/> No<br/><input type="radio"/> Yes</div>                                                                                                                                                                                                                                                                |
| Q036.1. Did she meet with a health care team? Palliative?                                        | <div><input type="radio"/> No<br/><input type="radio"/> Yes</div>                                                                                                                                                                                                                                                                |
| Q037. What treatments was the patient receiving at the time of the investigation?                | <div><input type="checkbox"/> Chemotherapy<br/><input type="checkbox"/> Intravenous Targeted<br/><input type="checkbox"/> Therapy Hormone Therapy<br/><input type="checkbox"/> Oral Targeted<br/><input type="checkbox"/> Therapy<br/><input type="checkbox"/> Radiotherapy<br/><input type="checkbox"/> Surgery<br/>Other</div> |
| Q037.1. Other treatments received at the time of the survey, please specify                      | <div>(Note the treatment or "Don't know" if you don't have the information)</div>                                                                                                                                                                                                                                                |
| Q038 Participant ID                                                                              | <div>(Double entry of the SENOVIE identifier)</div>                                                                                                                                                                                                                                                                              |
