# Supplementary material
Source: HighWire-hosted journal article supplement (https://bmjopen.bmj.com/content/15/4/e095759)
Supplement: inline-supplementary-material-6 [file inline-supplementary-material-6.pdf]

## Appendix 6. Consolidated criteria for reporting qualitative studies (COREQ): 32-item checklist

Reference: Tong A, Sainsbury P, Craig J. Consolidated criteria for reporting qualitative research (COREQ): a 32-item checklist for interviews and focus groups. International Journal for Quality in Health Care. 2007. Volume 19, Number 6: pp. 349 – 357

| Item No                                        | Guide Questions/Description                                                                                                                              | Reported on Page # |
|------------------------------------------------|----------------------------------------------------------------------------------------------------------------------------------------------------------|--------------------|
| <b>Domain 1: Research team and reflexivity</b> |                                                                                                                                                          |                    |
| <b>Personal Characteristics</b>                |                                                                                                                                                          |                    |
| 1. Interviewer/ facilitator                    | Which author/s conducted the interview or focus group?                                                                                                   | N/A                |
| 2. Credentials                                 | What were the researcher's credentials? E.g., PhD, MD                                                                                                    | N/A                |
| 3. Occupation                                  | What was their occupation at the time of the study?                                                                                                      | N/A                |
| 4. Gender                                      | Was the researcher male or female?                                                                                                                       | N/A                |
| 5. Experience and training                     | What experience or training did the researcher have?                                                                                                     | N/A                |
| <b>Relationship with participants</b>          |                                                                                                                                                          |                    |
| 6. Relationship established                    | Was a relationship established prior to study commencement?                                                                                              | p.19               |
| 7. Participant knowledge of the interviewer    | What did the participants know about the researcher? e.g. personal goals, reasons for doing the research?                                                | p.19               |
| 8. Interviewer characteristics                 | What characteristics were reported about the interviewer/facilitator? e.g. Bias, assumptions, reasons and interests in the research topic                | p.19               |
| <b>Domain 2: study design</b>                  |                                                                                                                                                          |                    |
| <b>Theoretical framework</b>                   |                                                                                                                                                          |                    |
| 9. Methodological orientation and Theory       | What methodological orientation was stated to underpin the study? e.g. grounded theory, discourse analysis, ethnography, phenomenology, content analysis | p.9-10; p.18-19    |
| <b>Participant selection</b>                   |                                                                                                                                                          |                    |
| 10. Sampling                                   | How were participants selected? e.g., purposive, convenience, consecutive, snowball                                                                      | p.18-19            |
| 11. Method of approach                         | How were participants approached? e.g., face-to-face, telephone, mail, email                                                                             | p.18-19            |
| 12. Sample size                                | How many participants were in the study?                                                                                                                 | p.18-19            |
| 13. Non-participation Setting                  | How many people refused to participate or dropped out? Reasons?                                                                                          | p.18-19            |
| 14. Setting of data collection                 | Where was the data collected? e.g., home, clinic, workplace                                                                                              | p.18-19            |
| 15. Presence of nonparticipants                | Was anyone else present besides the participants and researchers?                                                                                        | p.18-19            |
| 16. Description of sample                      | What are the important characteristics of the sample? e.g. demographic data, date                                                                        | p.18-19            |
| <b>Data collection</b>                         |                                                                                                                                                          |                    |
| 17. Interview guide                            | Were questions, prompts, and guides provided by the authors? Was it pilot tested?                                                                        | p.18-19            |
| 18. Repeat interviews                          | Were repeat interviews carried out? If yes, how many?                                                                                                    | N/A                |
| 19. Audio/visual recording                     | Did the research use audio or visual recording to collect the data?                                                                                      | p.18-19            |
| 20. Field notes                                | Were field notes made during and/or after the interview or focus group?                                                                                  | p.18-19            |
| 21. Duration                                   | What was the duration of the interviews or focus group?                                                                                                  | N/A                |

| Item No                                | Guide Questions/Description                                                                                                      | Reported on Page # |
|----------------------------------------|----------------------------------------------------------------------------------------------------------------------------------|--------------------|
| 22. Data saturation                    | Was data saturation discussed?                                                                                                   | p.18-19            |
| 23. Transcripts returned               | Were transcripts returned to participants for comment and/or correction?                                                         | N/A                |
| <b>Domain 3: analysis and findings</b> |                                                                                                                                  |                    |
| <b>Data analysis</b>                   |                                                                                                                                  |                    |
| 24. Number of data coders              | How many data coders coded the data?                                                                                             | N/A                |
| 25. Description of the coding tree     | Did the authors provide a description of the coding tree?                                                                        | N/A                |
| 26. Derivation of themes               | Were themes identified in advance or derived from the data?                                                                      | p.18-19            |
| 27. Software                           | What software, if applicable, was used to manage the data?                                                                       | N/A                |
| 28. Participant checking               | Did participants provide feedback on the findings?                                                                               | N/A                |
| <b>Reporting</b>                       |                                                                                                                                  |                    |
| 29. Quotations presented               | Were participant quotations presented to illustrate the themes/findings? Was each quotation identified? e.g., participant number | N/A                |
| 30. Data and findings consistent       | Was there consistency between the data presented and the findings?                                                               | N/A                |
| 31. Clarity of major themes            | Were major themes clearly presented in the findings?                                                                             | N/A                |
| 32. Clarity of minor themes            | Is there a description of diverse cases or a discussion of minor themes?                                                         | N/A                |
